# Supplementary material for: Polyaniline-decorated porous carbons with engineered meso/macrochannels for high performance capacitive deionization
Source: Royal Society of Chemistry journal article supplement (doi:10.1039/d2ta07929a), 2022-01-01
Supplement: d2ta07929a1.pdf [file d2ta07929a1.pdf]

## Electronic Supplementary Information

for

### **Polyaniline-decorated porous carbons with engineered meso/macro-channels for High performance capacitive deionization**

Bofeng Li<sup>a</sup>, Qi Cao<sup>a</sup>, Ya Liu<sup>a,b</sup>, Yukuo Sun<sup>a</sup>, Xinlong Ma<sup>a</sup>, Xiaoguang Duan<sup>b</sup>, Chunmao Chen<sup>a</sup>, and  
Yuxian Wang<sup>a,\*</sup>

<sup>a</sup> State Key Laboratory of Heavy Oil Processing, State Key Laboratory of Petroleum Pollution Control,  
China University of Petroleum-Beijing, Beijing 102249, China.

<sup>b</sup> School of Chemical Engineering and Advanced Materials, The University of Adelaide, Adelaide, SA  
5005, Australia

\*Corresponding Author

E-mail address: yuxian.wang@cup.edu.cn

### **Text S1. Synthesis of PACs and PAC/mPANI**

Porous activated carbon (PAC) was prepared as follow. First, 30 g KOH and 10 g asphalt powder were transferred in the mechanic blender and ground them up until they were well mixed. Then the mixture was placed in the die of the tableting press and 10 MPa pressure was applied. After that, the pressed sample was sintered under Ar atmosphere from room temperature to 800 °C for 1 h and allowed to naturally cool down to room temperature. The heating ramp was set as 10 °C min<sup>-1</sup>. After the heat treatment, the sample was washed by HCl solution (1 M) and deionized water ( $V_{\text{HCl}}:V_{\text{DI}} = 1:3$ ) for 3 times to remove any impurities. The resultant black solid material was dried in vacuum at 60 °C for 12 h and denoted as PAC-10. Similarly, PAC-0, PAC-5, PAC-8, PAC-12, and PAC-15 were synthesized with no pressure, 5 MPa, 8 MPa, 12 MPa, and 15 MPa pressure was applied, respectively.

PAC/20PANI was synthesized via oxidative polymerization with PAC-10 as the precursor. First, 200  $\mu\text{L}$  of aniline (which was 20 wt.% of PAC-10) was dispersed into a mixture solution containing 20 mL 1 M HCl solution and 2 mL ethanol. The mixture was stirred in an ice bath for 10 min. After that, 1 g of PAC-10 was dispersed into the above solution under stirring for 30 min to form the solution A. After that, 500 mg of ammonium persulfate (APS) was dissolved in 2.5 mL 1 M HCl to form the solution B. Subsequently, solution B was added to solution A under vigorous stirring. This dispersion solution was kept stirring in an ice bath for 12 h. Then, the product was collected by vacuum filtration and washed thoroughly with deionized water and ethanol until the filtrate changed from emerald green to colorless. This resultant filter cake was then dried at 60 °C for 24 h to obtain PAC/20PANI. PAC/10PANI and PAC/30PANI were also synthesized by the similar procedures except 10 wt.% and 30 wt.% aniline was added. To compared PAC-0/20PANI was synthesized with PAC-0 as the precursor.

## **Text S2. Detailed description of the characterization methods**

Morphologies of the samples were observed on a Quanta 200F SEM at an accelerating voltage of 5 kV. Transmission electron microscopy (TEM) images were obtained from JEOL 2100F (UHR). The TEM instrument was employed to provide in-depth structural information. Moreover, N<sub>2</sub> sorption isotherms were acquired on JW-BK222 to measure the Brunauer–Emmett–Teller (BET) specific surface areas (SSA) and Barrett-Joyner-Halenda (BJH) pore size distribution. Prior to the testing, the samples were degassed at 100 °C overnight under vacuum condition. Surface composition of the carbon materials were characterized by X-ray photoelectron microscopy (XPS, 2PHI Quantera scanning X-ray microprobe) under ultra-high vacuum (UHV) condition with Al–K $\alpha$  X-ray irradiation. FT-IR was performed in the range 400–4000 cm<sup>-1</sup> to characterize the changes in organic functional groups and carbon materials is complexed with KBr (material: KBr=1: 200). Raman spectra of the samples were recorded by a Renishaw RM2000 Raman spectrometer with the wavelength of 532 nm. Dynamic contact angle measurements of as-obtained materials in water systems were performed on the optical contact angle & interface tension meter (SL200KS, USA). Electrical conductivity of solid powder materials was measured by multifunctional automatic resistivity meter (GM-II, Weida).

## **Text S3. Preparation of electrode materials**

The electrode slurry was prepared by mixing 80 wt.% as-synthesized materials, 10 wt.% conductive carbon black, 10 wt.% poly-vinylidene fluoride (PVDF), and a trace amount of N-methylpyrrolidone (NMP). The obtained slurry was uniformly painted on the current collector of and dried for 12 h at 100 °C in a vacuum oven. The electrode plates for three-electrode test, two-electrode test and capacitive desalination test were 1×1 cm<sup>2</sup> carbon cloth, d=13 mm carbon cloth and 5×5 cm<sup>2</sup> graphite paper, respectively. In a three-electrode system, 0.5 M NaCl solution was used as the electrolyte, CV

measurements were performed at scan rate of  $5 \text{ mV s}^{-1}$  at a voltage window range of  $-0.2$  to  $0.8 \text{ V}$ . GCD tests were conducted at a current density  $1 \text{ A g}^{-1}$  with a potential window range of  $-0.2$  to  $0.8 \text{ V}$ . The electrochemical impedance spectroscopy (EIS) was tested in the frequency range of  $0.01 \text{ Hz}$  to  $100 \text{ KHz}$  of  $10 \text{ mV}$  amplitude. In a two-electrode system,  $1 \text{ M Na}_2\text{SO}_4$  solution and glass microfiber (Whatman, GF/D1823-047) were used as the electrolyte and separator, respectively. The mass loading of the as-synthesized materials for each electrode was about  $2 \text{ mg}$ . GCD tests were conducted at a current density  $1 \text{ A g}^{-1}$  with a potential window range of  $0$  to  $1.2 \text{ V}$ .

**Table S1.** The SSA and pore size distribution of PAC-n and PAC/mPANI.

| Sample       | SSA<br>(m <sup>2</sup> g <sup>-1</sup> ) | V <sub>total</sub><br>(cm <sup>3</sup> g <sup>-1</sup> ) | V <sub>mic</sub><br>(cm <sup>3</sup> g <sup>-1</sup> ) | V <sub>mac/mes</sub><br>(cm <sup>3</sup> g <sup>-1</sup> ) |
|--------------|------------------------------------------|----------------------------------------------------------|--------------------------------------------------------|------------------------------------------------------------|
| PAC-0        | 2983                                     | 1.63                                                     | 1.30                                                   | 0.33                                                       |
| PAC-5        | 2991                                     | 1.64                                                     | 1.14                                                   | 0.51                                                       |
| PAC-8        | 2997                                     | 1.67                                                     | 1.15                                                   | 0.51                                                       |
| PAC-10       | 3002                                     | 1.68                                                     | 1.14                                                   | 0.54                                                       |
| PAC-12       | 2981                                     | 1.63                                                     | 1.11                                                   | 0.53                                                       |
| PAC-15       | 2979                                     | 1.60                                                     | 1.08                                                   | 0.52                                                       |
| PAC/30PANI   | 1816                                     | 1.03                                                     | 0.66                                                   | 0.37                                                       |
| PAC/20PANI   | 2176                                     | 1.26                                                     | 0.85                                                   | 0.41                                                       |
| PAC/10PANI   | 2498                                     | 1.45                                                     | 1.02                                                   | 0.430                                                      |
| PAC-0/20PANI | 2146                                     | 1.21                                                     | 0.83                                                   | 0.38                                                       |

**Table S2.** XPS full survey and high-resolution XPS surveys of C 1s region for the as-synthesized PAC-10 and PAC/mPANI.

| Material   | Full Survey |            |            | High resolution C1s survey |                            |               |               |                | $\pi$ - $\pi$<br>shake<br>up<br>(at%) |
|------------|-------------|------------|------------|----------------------------|----------------------------|---------------|---------------|----------------|---------------------------------------|
|            | C<br>(at%)  | N<br>(at%) | O<br>(at%) | sp <sup>2</sup> C<br>(at%) | sp <sup>3</sup> C<br>(at%) | C-OH<br>(at%) | -C=O<br>(at%) | O-C=O<br>(at%) |                                       |
| PAC-10     | 94.6        | 0          | 5.4        | 47.9                       | 24.3                       | 11.4          | 6.3           | 6.5            | 3.6                                   |
| PAC/10PANI | 91.9        | 1.5        | 6.1        | 48.7                       | 22.5                       | 11.6          | 6.6           | 6.7            | 3.9                                   |
| PAC/20PANI | 91.4        | 2.1        | 6.5        | 49.1                       | 20.3                       | 11.9          | 7.1           | 6.8            | 4.8                                   |
| PAC/30PANI | 90.0        | 3.4        | 6.6        | 49.7                       | 18.7                       | 12.3          | 7.3           | 6.9            | 5.1                                   |

**Table S3.** High-resolution XPS surveys of N 1s and O 1s region for the as-synthesized PAC-10 and PAC/mPANI.

| Material   | High resolution N1s survey |            |           | High resolution O1s survey |                             |                         |
|------------|----------------------------|------------|-----------|----------------------------|-----------------------------|-------------------------|
|            | -N= (at%)                  | -NH- (at%) | -N+ (at%) | -C=O (at%)                 | -C-O/-NO <sub>x</sub> (at%) | Chemisorbed water (at%) |
| PAC-10     | -                          | -          | -         | 53.7                       | 33.8                        | 12.5                    |
| PAC/10PANI | 39.3                       | 32.0       | 28.7      | 59.0                       | 30.8                        | 10.2                    |
| PAC/20PANI | 37.3                       | 33.2       | 29.5      | 58.7                       | 29.6                        | 11.7                    |
| PAC/30PANI | 32.7                       | 34.8       | 32.4      | 54.4                       | 34.5                        | 11.1                    |

**Table S4.** Potential of zero charge ( $E_{pzc}$ ), short circuit potential ( $E_0$ ), and their potential difference ( $\Delta E$ ) of PACs and PAC/mPANI.

| Sample       | $E_{pzc}$ (V) | $E_0$  | $\Delta E$ |
|--------------|---------------|--------|------------|
| PAC-0        | 0.1501        | 0.0938 | 0.0563     |
| PAC-5        | 0.1539        | 0.1126 | 0.0413     |
| PAC-10       | 0.1478        | 0.1146 | 0.0332     |
| PAC-15       | 0.1473        | 0.1357 | 0.0116     |
| PAC/10PANI   | 0.1355        | 0.1241 | 0.0114     |
| PAC/20PANI   | 0.1758        | 0.1729 | 0.0029     |
| PAC/30PANI   | 0.1347        | 0.1241 | 0.0106     |
| PAC-0/20PANI | 0.1750        | 0.1620 | 0.013      |

**Table S5.** Comparison of salt adsorption capacity and stability with PAC/20PANI and previous literatures.

| Material                         | Voltage (V) | Initial salt concentration (mg L <sup>-1</sup> ) | SAC (mg g <sup>-1</sup> ) | Two electrodes Cycle number | Retention rate | Specific capacity (F g <sup>-1</sup> ) | Ref.      |
|----------------------------------|-------------|--------------------------------------------------|---------------------------|-----------------------------|----------------|----------------------------------------|-----------|
| CPC                              | 1.2         | 1500–1700                                        | 18.9                      | 300                         | 92%            | 168.2                                  | 1         |
| HMYSC                            | 1.4         | 500                                              | 16.1                      | -                           | -              | 204                                    | 2         |
| PaniT-AC                         | 1.4         | 500                                              | 30.5                      | -                           | -              | 237                                    | 3         |
| N-PC                             | 1.2         | 500                                              | 22.4                      | -                           | -              | 229                                    | 4         |
| NPC                              | 1.2         | 500                                              | 21.4                      | 100                         | 97%            | 163                                    | 5         |
| 3DGA-OP                          | 1.2         | 500                                              | 14.4                      | -                           | -              | 160                                    | 6         |
| hierarchically porous non-carbon | 1.2         | 500                                              | 23.6                      | -                           | -              | 171                                    | 7         |
| PAC/20PANI                       | 1.2         | 500                                              | 35.3                      | 20000                       | 97.06%         | 247                                    | This work |

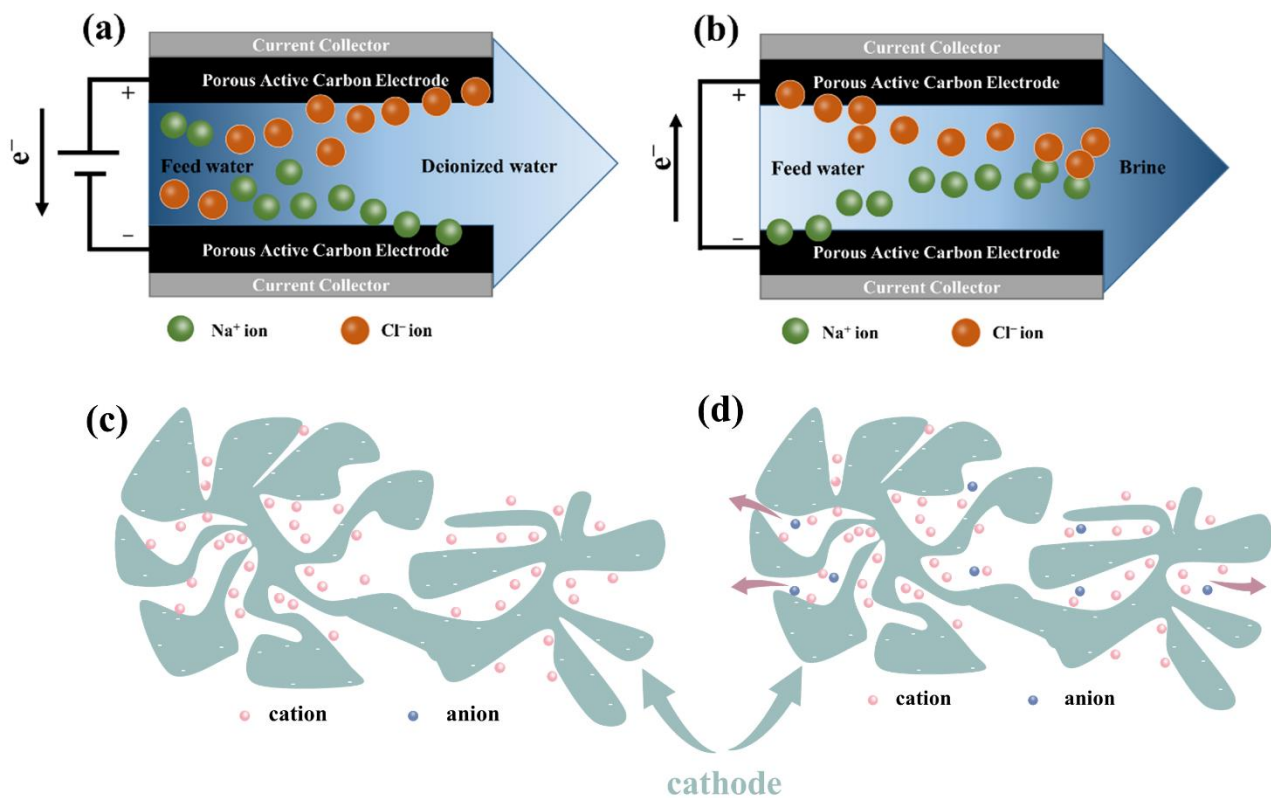

**Figure S1.** (a) Schematic illustration of a typical CDI process; (b) The regeneration process proceeds by short circuiting Counter-ion adsorption on CDI electrode; (c) Schematic illustration of counter ion adsorption on the negatively charge electrode; (d) Schematic illustration of co-ion desorption or ion swapping (ion exchange) on the negatively charge electrode.



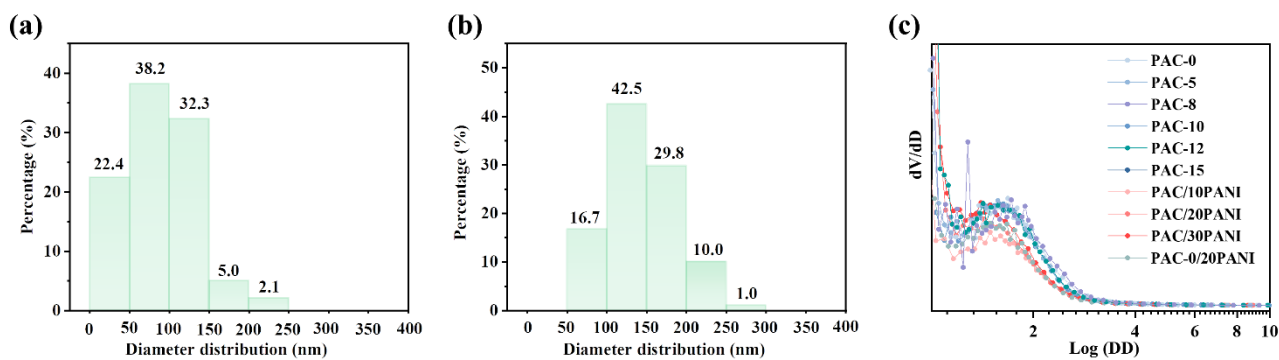

**Figure S2.** Statistics of pore size distribution of PACs prepared tablet pressure based on SEM images: 0 MPa (a); 10 MPa (b); BJH desorption pore volume distribution of Log (DD/nm)-dV/dD for PACs and PAC/PANIs (c).

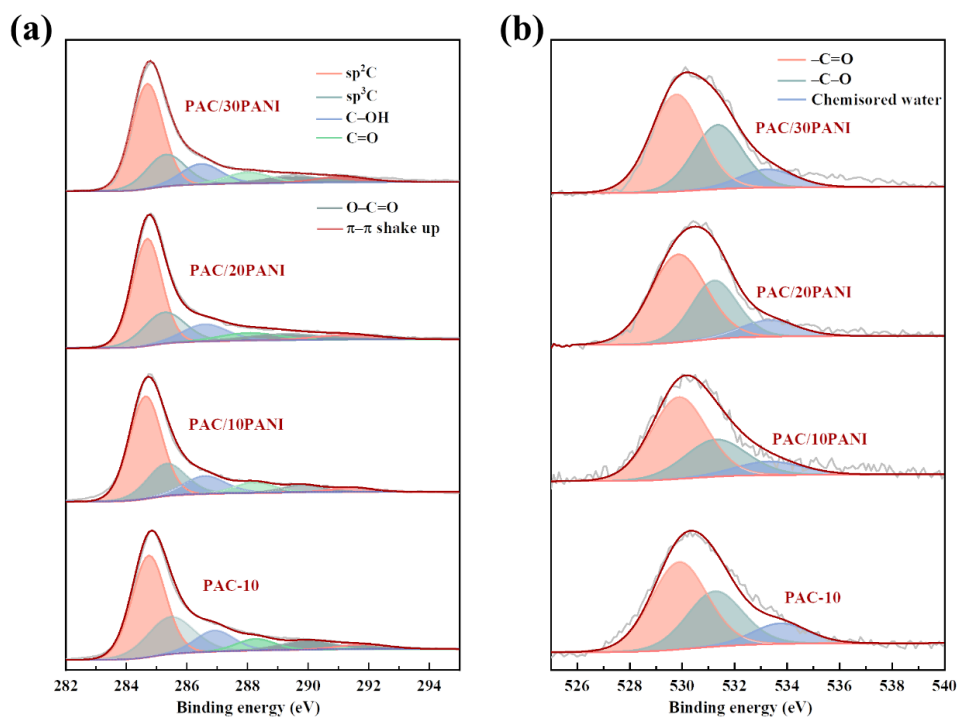

**Figure S3.** High-resolution XPS spectra of PAC-10 and PAC/mPANI: C 1s (a); O 1s (b).

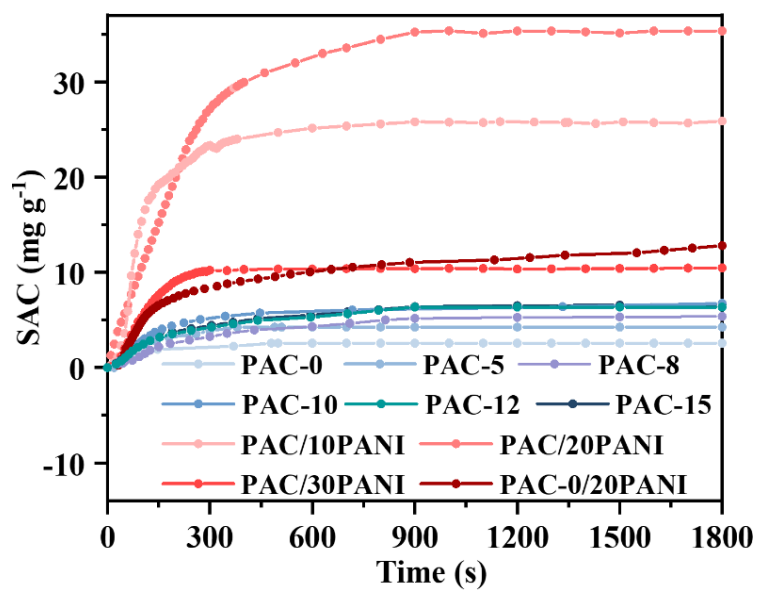

Figure S4. The SAC of PACs and PAC/PANIs.

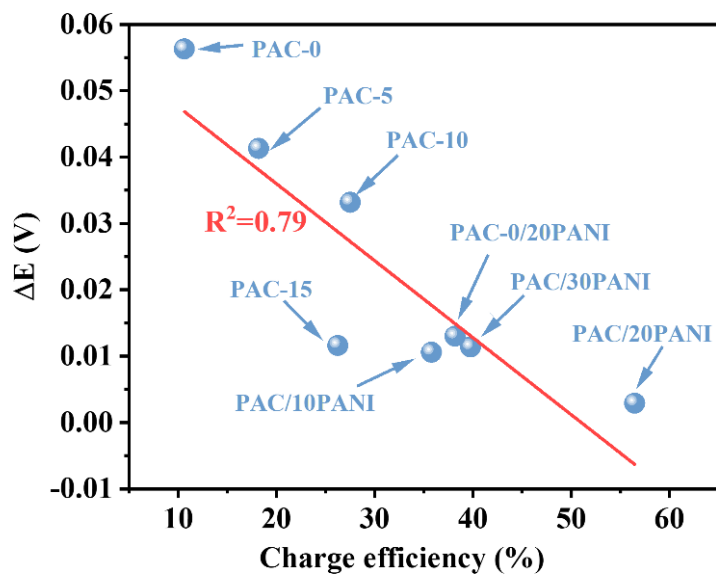

Figure S5. Correlation between  $\Delta E$  and SAC for PACs and PAC/PANIs.

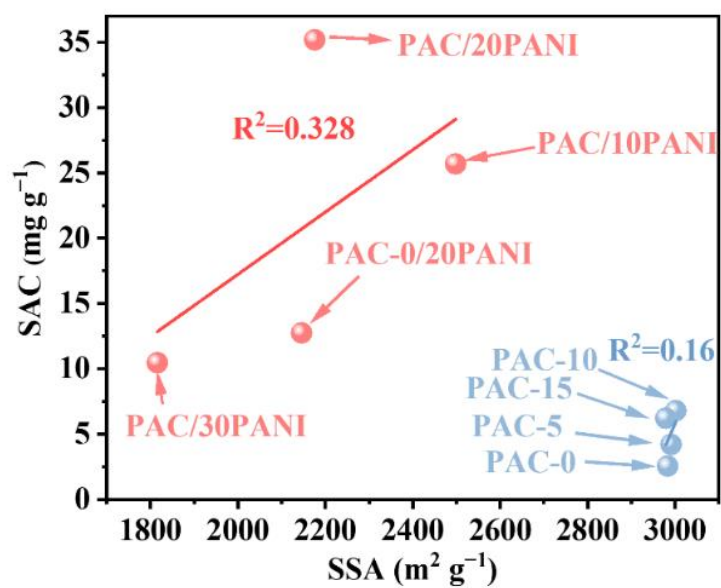

**Figure S6.** Correlation between SSA and the SAC for PACs and PAC/mPANI.

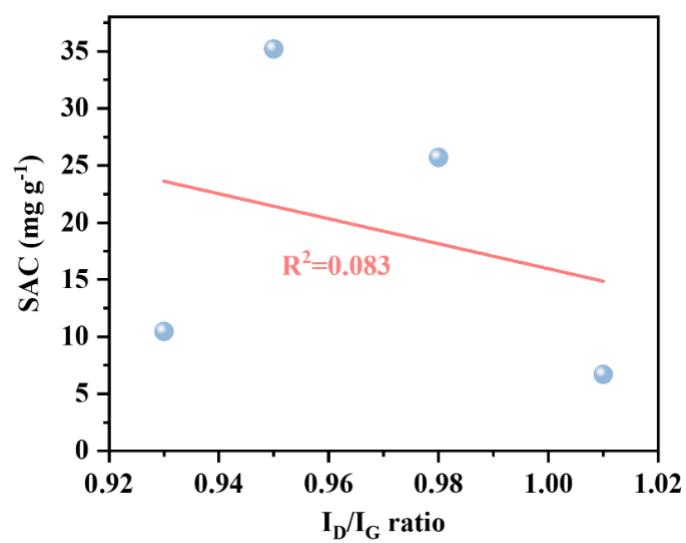

**Figure S7.** Correlation between  $I_D/I_G$  ratio and the SAC.

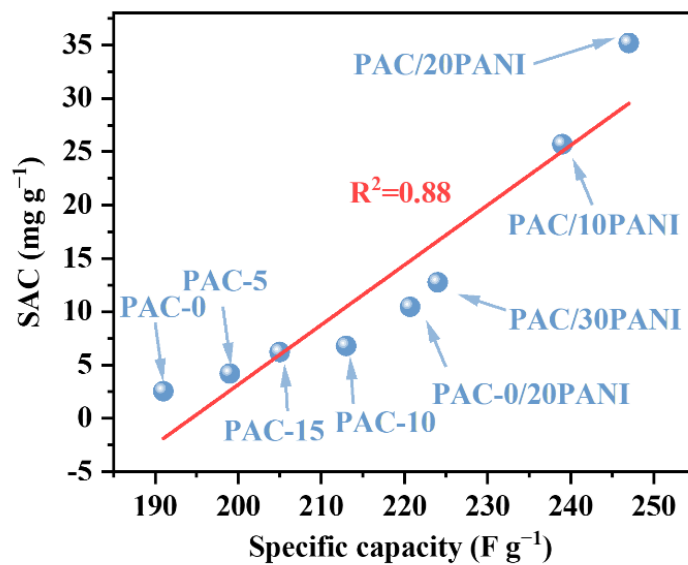

**Figure S8.** Correlation between specific capacity and the SAC.

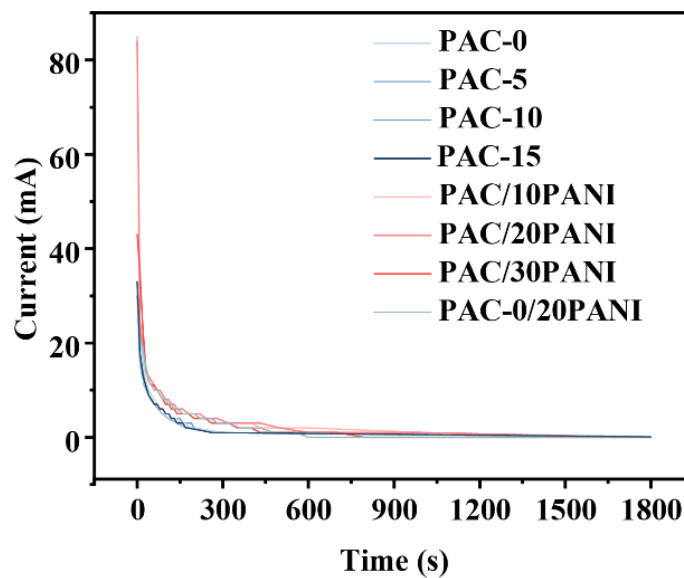

**Figure S9.** Current change of PACs and PAC/mPANI during deionization process.

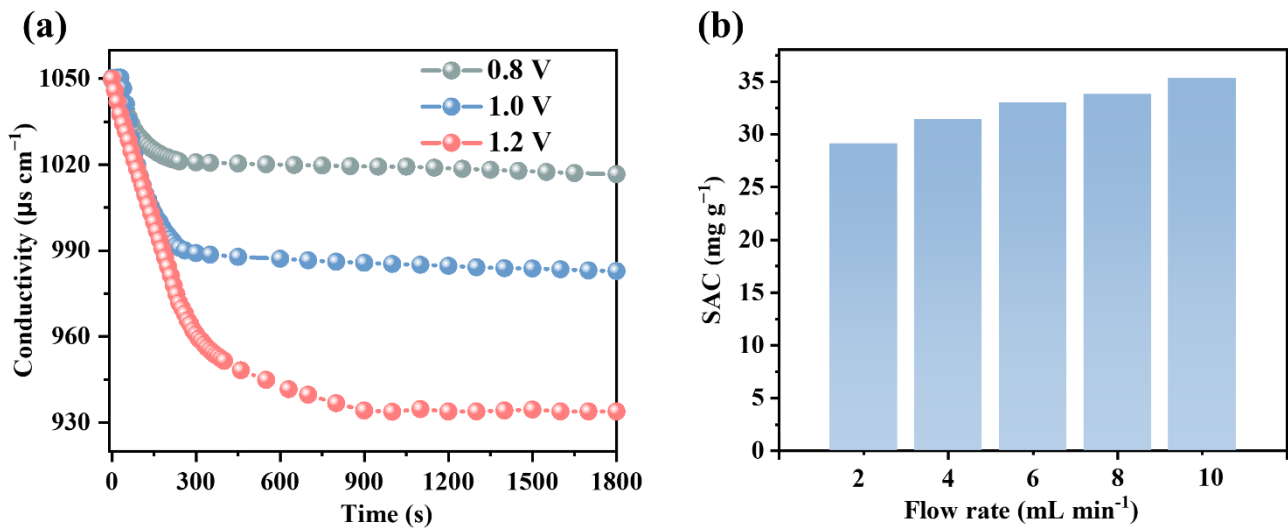

**Figure S10.** Conductivity variations of PAC/20PANI at different voltages (a); SAC of PAC/20PANI at different flow rates (b);

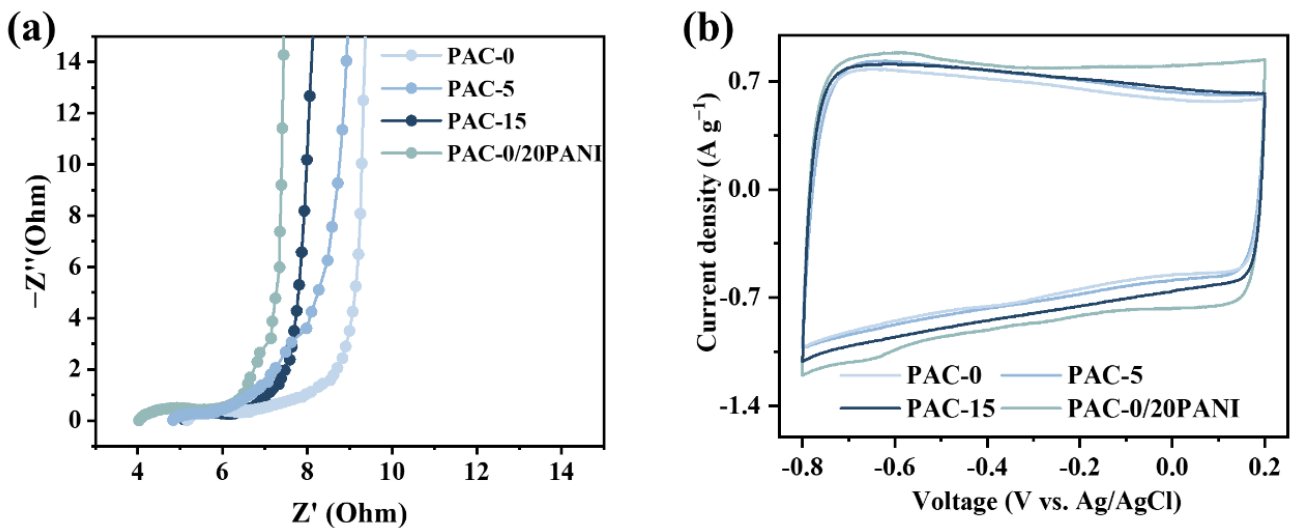

**Figure S11.** Electrochemical characterization of PAC-0, PAC-5, PAC-15 and PAC-0/20PANI in three-electrode system with 0.5 M NaCl solution as the electrolyte: EIS spectra in the frequency range of 0.01 Hz to 100 KHz of 10 mV amplitude (a); CV curves at scan rate of  $5 \text{ mV s}^{-1}$  (b).

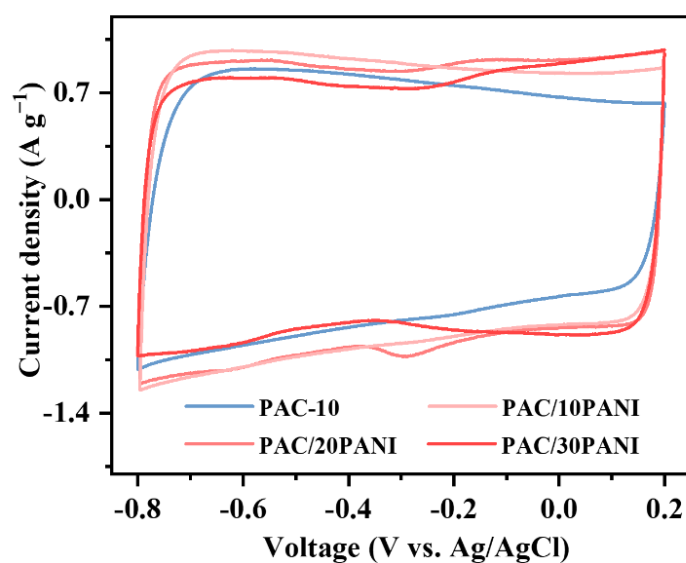

**Figure S12.** CV curves at scan rate of  $5 \text{ mV s}^{-1}$  of PAC-10, PAC/10PANI, PAC/20PANI and PAC/30PANI in three-electrode system with  $0.5 \text{ M NaCl}$  solution as the electrolyte.

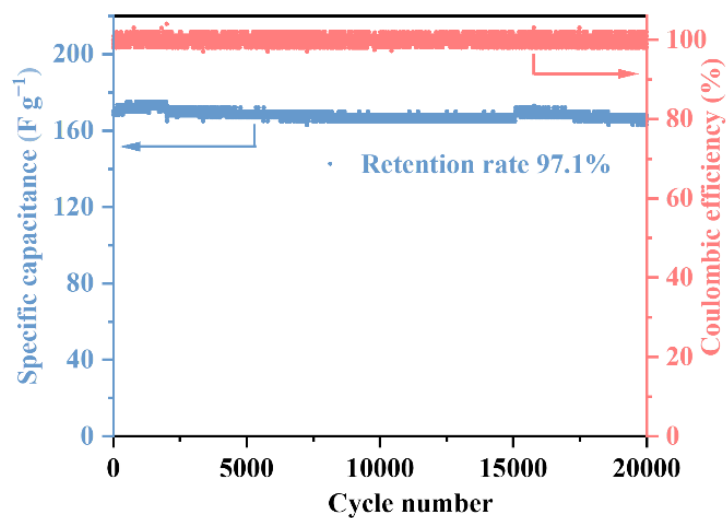

**Figure S13.** Electrochemical characterization of PAC/20PANI in button battery and with  $1 \text{ M Na}_2\text{SO}_4$  as the electrolyte: Cycling performance at  $1 \text{ A g}^{-1}$  and voltage range is  $0\text{--}1.2 \text{ V}$ .

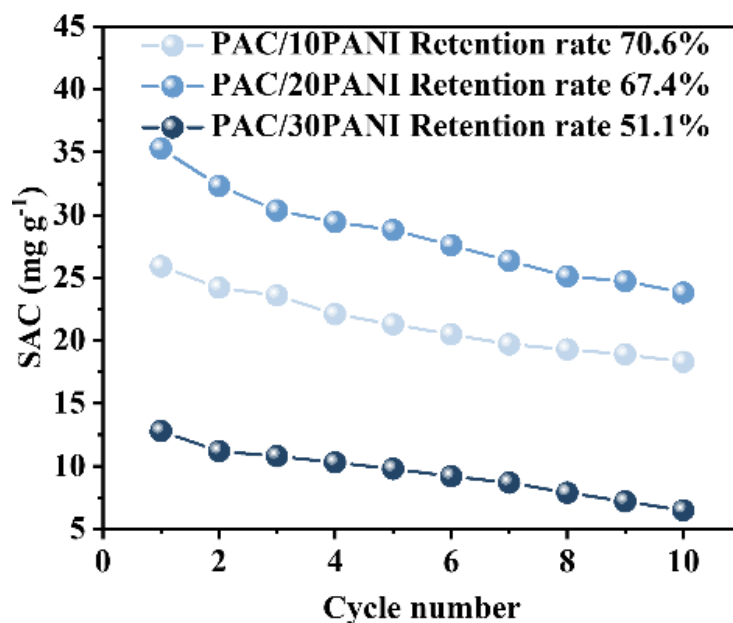

**Figure S14.** Electrode reversibility tests for PAC loaded with different amounts of PANI.

## References

- 1 S. F. Evans, M. R. Ivancevic, D. J. Wilson, Z. D. Hood, S. P. Adhikari, A. K. Naskar, C. Tsouris and M. P. Paranthaman, *Desalination*, 2019, **464**, 25-32.
- 2 H. Wang, T. Yan, L. Shi, G. Chen, J. Zhang and D. Zhang, *ACS Appl. Mater.*, 2017, **5**, 3329-3338.
- 3 B. Pna, B. Jya, B. Gza and B. Jla, *Electrochim. Acta*, 2020, **339**, 135920.
- 4 S. Huo, W. Ni, Y. Zhao, X. Song, Y. Zhao, K. Li, H. Wang and M. Zhang, *J. Mater. Chem. A*, 2021, **9**, 3066-3076.
- 5 H. Wang, T. Yuan, L. Huang, Y. He, B. Wu, L. Hou, Q. Liao and W. Yang, *Sci. Total Environ.*, 2020, **720**, 137637.
- 6 Y. Zhu, G. Zhang, C. Xu and L. Wang, *ACS Appl. Mater.*, 2020, **12**, 29706-29716.
- 7 Y. Wu, G. Jiang, G. Liu, G. Lui, Z. P. Cano, Q. Li, Z. Zhang, A. Yu, Z. Zhang and Z. Chen, *J. Mater. Chem. A*, 2019, **7**, 15633-15639.
